# Supplementary material for: Measurement Report: Water diffusion in single suspended phase-separated aerosols
Source: Copernicus journal article supplement (doi:10.5194/egusphere-2023-1346), 2023-07-12
Supplement: Supplementary file 1 [file egusphere-2023-1346-supplement.pdf]

Supplementary Information for:  
Water diffusion in single suspended phase-separated  
aerosols

Yu-Kai Tong,<sup>†</sup> Zhijun Wu,<sup>‡</sup> Min Hu,<sup>‡</sup> and Anpei Ye<sup>\*,†</sup>

*<sup>†</sup>Key Laboratory for the Physics and Chemistry of Nanodevices, School of Electronics,  
Peking University, Beijing 100871, China*

*<sup>‡</sup>State Key Joint Laboratory of Environmental Simulation and Pollution Control, College of  
Environmental Sciences and Engineering, Peking University, Beijing 100871, China*

E-mail: yap@pku.edu.cn

## S1 Aerosol trapping chamber

**Figure S1 Aerosol trapping chamber** - (a) Overview, 1-Top cover with coverslip, 2-Chamber exterior, 3-Exhaust port, 4-Bottom baffle, 5&6-Fixing bolts and nuts, 7-Inlets for aerosols, nitrogen, and other possible substances; (b) Profile, 8-Bottom coverslip, 9-Top coverslip, 10-Inner cylinder baffle, 11-Rubber O-rings, 12&13-Fixing bolts and nuts. The path of incoming aerosol droplets and mixture of dry and wet nitrogen is expressed with red arrowed lines. The aerosols were generated from desired mother solutions by a medical ultrasonic nebulizer (Mint PN100). The radii of the generated droplets are  $4\sim 10\ \mu\text{m}$  with a median of  $5\ \mu\text{m}$ .

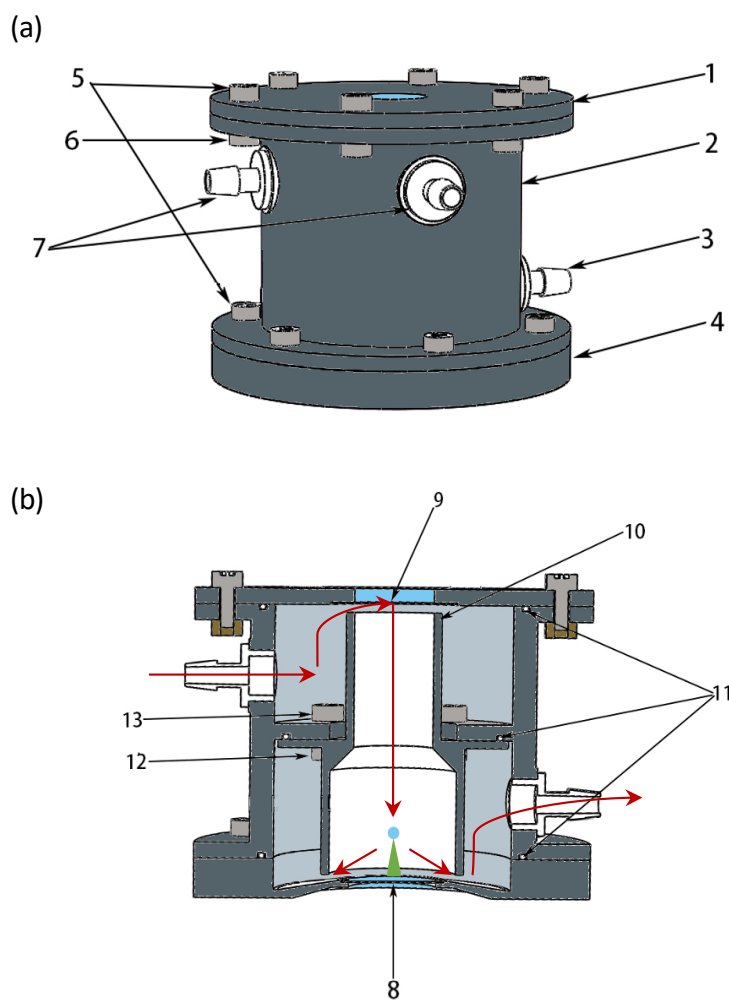

## S2 Raman spectra of phase-separated aerosols

**Figure S2 Raman spectra of aerosols with various morphologies** - (a) Spectrum of homogenous aerosol. The high-quality WGMs indicates a spheric shape and the internal isotropy. (b) Spectrum of core-shell aerosol. The weak but noticeable WGMs indicates the symmetry of the particle remains, albeit the destruction of internal isotropy. (c) Spectrum of partly engulfed aerosol. No WGMs indicates the destruction of both isotropy and symmetry in the particle.

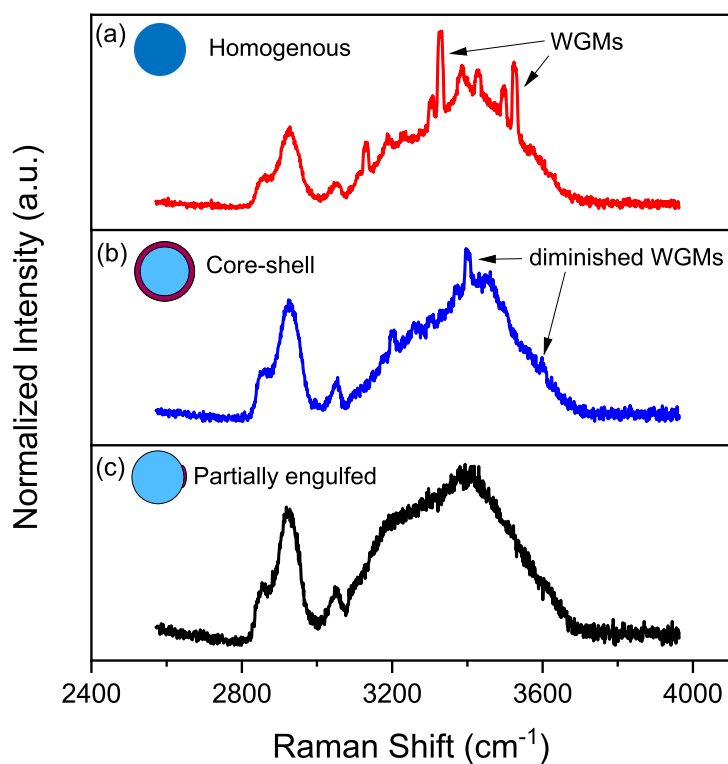

### S3 Raman spectra of bulk mother solutions

Figure S3 Raman spectra of bulk solutions containing  $\text{H}_2\text{O}$  or  $\text{D}_2\text{O}$  - As O-D and O-H have different energy levels, the  $\text{H}_2\text{O}$  and  $\text{D}_2\text{O}$  solutions have strikingly different Raman peaks which respectively locates at 640~660 nm and 605~625 nm. Thus, the rise and fall of O-D/O-H peaks in Raman spectra can be used to trace water diffusion within aerosols.

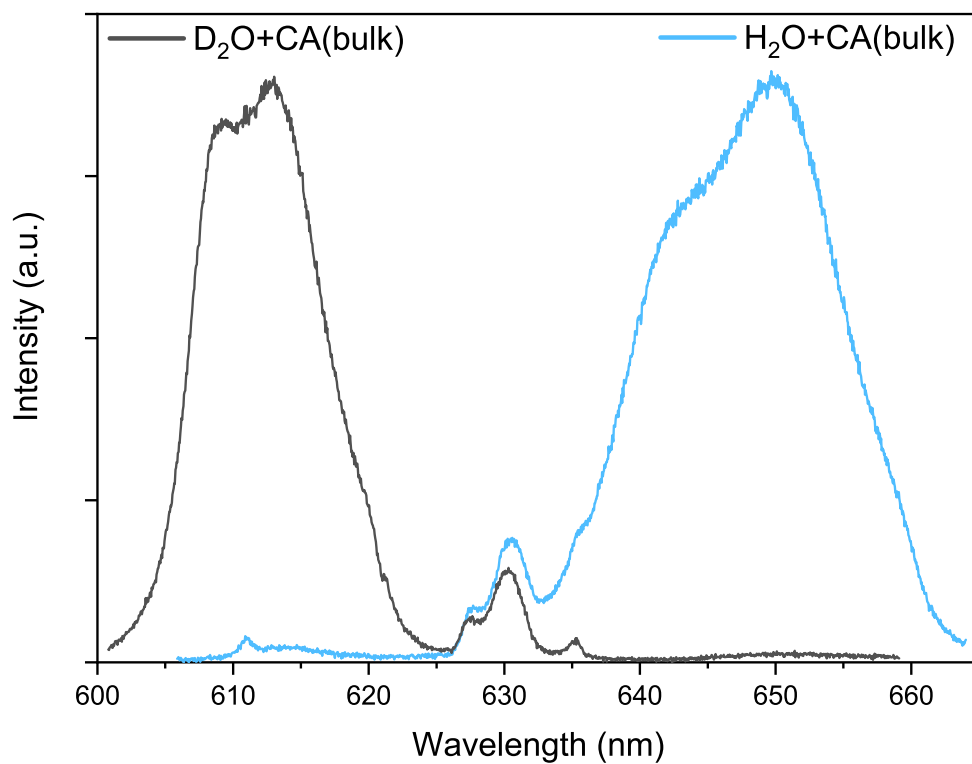

## S4 Influence of WGMs on peak area

**Figure S4 Influence of WGMs of the calculated  $\phi_{OD}$**  - (a) The temporal variations of fractional concentration of water molecules within the droplet. The peak areas of O-D band and O-H band are calculated with excluding the WGMs in the Raman spectra. The results have no appreciable discrepancy with that in Fig. 6B in the main text. (b) The deviations of  $\phi_{OD}$  when considering or ignoring the contribution of WGMs. It shows that the deviations are incredibly trivial of which the maximum is merely  $7 \times 10^{-3}$ .

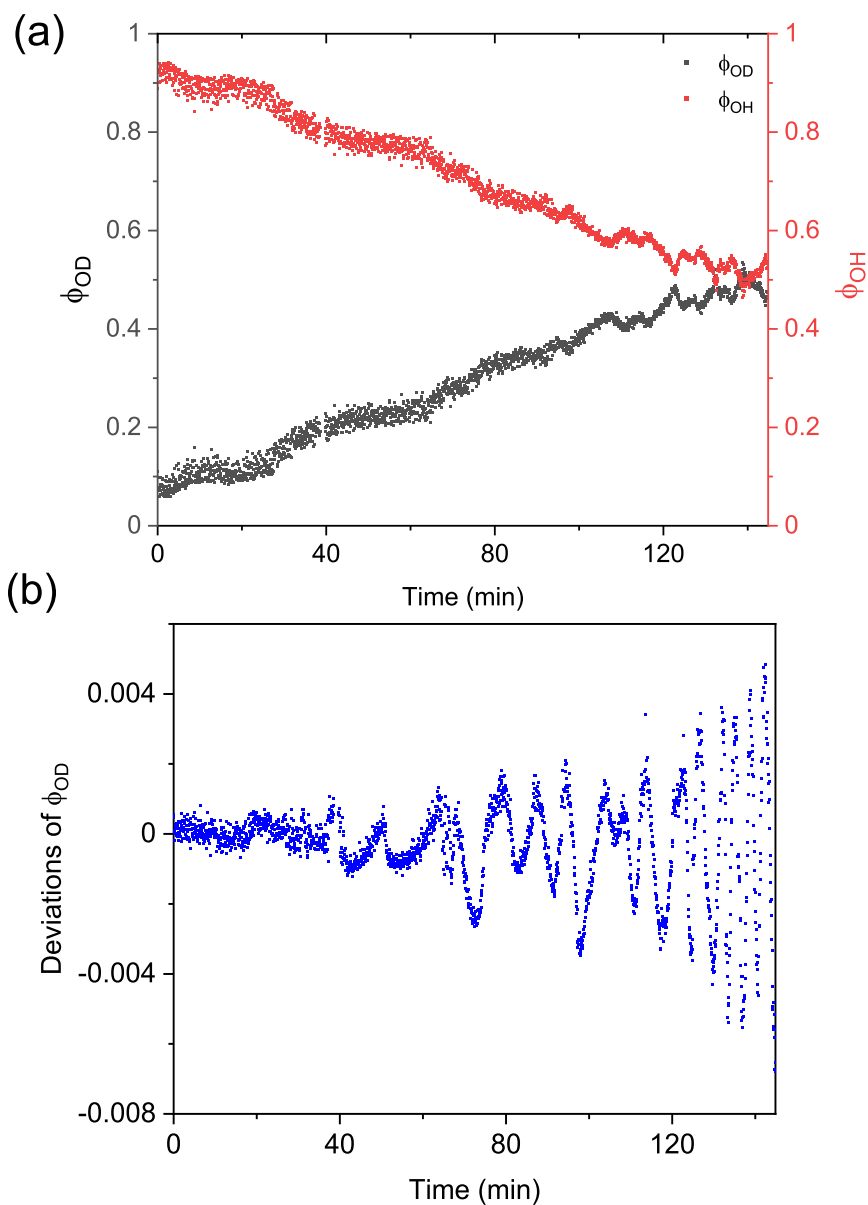

## S5 Fickian fitting

**Figure S5 Fitting the observed  $\phi_{OD}$  with the modified Fickian diffusion model**  
- An example of fitting the observed  $\phi_{OD}$  data with the modified Fickian diffusion model. The data points are from H<sub>2</sub>O+AS+DLT (Stage I). It shows the model works well with the data. The fitted parameter  $\chi$  indicates the diffusion extent and  $a^2/(\pi^2 D_w)$  means the time of diffusing to an isotropically stable state.

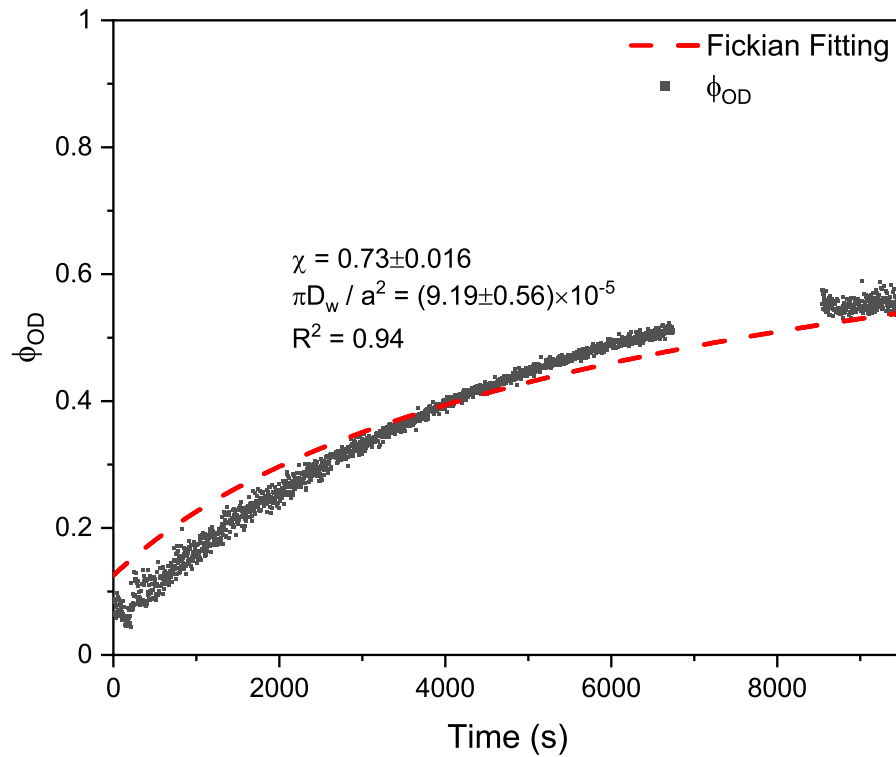

## S6 Comparison of the water diffusion coefficients

**Table S1 Water diffusion coefficients of aerosols measured with various methods**

| Aerosol                                | RH (%) | $D_w$ ( $m^2s^{-1}$ )  | Method           | Reference                   |
|----------------------------------------|--------|------------------------|------------------|-----------------------------|
| H <sub>2</sub> O+CA                    | 60     | $2.51 \times 10^{-11}$ | isotope exchange | Davies et al. <sup>1</sup>  |
| H <sub>2</sub> O+Sucrose               | 50     | $1.01 \times 10^{-13}$ | RH oscillation   | Preston et al. <sup>2</sup> |
|                                        | 60     | $3.98 \times 10^{-12}$ | isotope exchange | Davies et al. <sup>1</sup>  |
|                                        | 60     | $1.17 \times 10^{-13}$ | diffusion model  | Zobrist et al. <sup>3</sup> |
| H <sub>2</sub> O+Sucrose+CA            | 40     | $1.01 \times 10^{-13}$ | isotope exchange | Davies et al. <sup>1</sup>  |
| H <sub>2</sub> O+AS+OA                 | 60     | $1.32 \times 10^{-15}$ | isotope exchange | This work                   |
| H <sub>2</sub> O+AS+DLT                | 60     | $5.36 \times 10^{-16}$ |                  |                             |
| H <sub>2</sub> O+AS+HEX                | 60     | $2.25 \times 10^{-16}$ |                  |                             |
| H <sub>2</sub> O+AS+DLT+H <sup>+</sup> | 60     | $3.99 \times 10^{-15}$ |                  |                             |

For H<sub>2</sub>O+CA droplet, according to the results of Davies et al.<sup>1</sup>, the calculated  $\tau_{\text{mixing}}$  is  $\sim 20$  s which is in the same order magnitude as the observed  $\tau_{\text{OD}}$  ( $\sim 80$  s) in this work. For the phase-separated droplets, the measured  $D_w$  is considerably lower than the values of homogenous droplets studied in literature works, which indicates the occurrence of the water diffusion limitations.

## S7 RH correction

The equilibrium vapor pressures of D<sub>2</sub>O and H<sub>2</sub>O are slightly different at the same temperature conditions. Thus, after switching from H<sub>2</sub>O to D<sub>2</sub>O, the RH probe measurement needs to be corrected. The relationship of the two equilibrium vapor pressures can be specified as

$$\ln \frac{p_{\text{H}_2\text{O}}^0}{p_{\text{D}_2\text{O}}^0} = A + \frac{B}{C + T} = \Lambda, \quad (1)$$

where  $A = -0.30661$ ,  $B = 9.14056$ ,  $C = 75.753$ ,  $T$  is in Celsius,  $p_{\text{H}_2\text{O}}^0$  is the equilibrium vapor pressure of H<sub>2</sub>O, and  $p_{\text{D}_2\text{O}}^0$  is the equilibrium vapor pressure of D<sub>2</sub>O.

If not correcting the RH (i.e. not changing the setting value of RH after switching the moisture), the actual RH value will be  $e^\Lambda$  times the readout of the RH probe. Therefore, to keep a constant RH condition, the RH setting value should be corrected as  $\text{RH}_{\text{post}} = \text{RH}_{\text{pre}} \cdot e^\Lambda$ , where  $\text{RH}_{\text{post}}$  is the setting value after moisture switching and  $\text{RH}_{\text{pre}}$  is the setting value before switching.



## S8 Reagents and sample preparation

The mother solutions used to generate the aerosol droplets were prepared by double-distilled water (18.2 M $\Omega$  cm; Milli-Q; MilliporeSigma, Burlington, MA, United States). Solute citric acid was purchased from Beijing Modern Oriental Fine Chemical Co., Ltd. (Beijing, China); Oleic acid was purchased from Xilong Scientific Co., Ltd. (Guangdong, China); Diethyl-L-tartrate was purchased from Shanghai D&B Biotechnology Co., Ltd. (Shanghai, China); 1,2,6-hexanetriol was purchased from Shanghai Macklin Biochemical Co., Ltd. (Shanghai, China); Ammonium sulfate was purchased from Tong Guang Fine Chemical Co. (Beijing, China). The D<sub>2</sub>O was purchased from Cambridge Isotope Laboratories, Inc. (Andover, USA).

## References

- (1) Davies, J. F.; Wilson, K. R. Raman spectroscopy of isotopic water diffusion in ultravisous, glassy, and gel states in aerosol by use of optical tweezers. *Analytical Chemistry* **2016**, *88*, 2361–2366.
- (2) Preston, T. C.; Davies, J. F.; Wilson, K. R. The frequency-dependent response of single aerosol particles to vapour phase oscillations and its application in measuring diffusion coefficients. *Phys. Chem. Chem. Phys.* **2017**, *19*, 3922–3931.
- (3) Zobrist, B.; Soonsin, V.; Luo, B. P.; Krieger, U. K.; Marcolli, C.; Peter, T.; Koop, T. Ultra-slow water diffusion in aqueous sucrose glasses. *Phys. Chem. Chem. Phys.* **2011**, *13*, 3514–3526.
